# Supplementary material for: Validation of an Italian Questionnaire of Adherence to the Ketogenic Dietary Therapies: iKetoCheck
Source: Preprints.org preprint supplement (doi:10.20944/preprints202306.1010.v1), 2023-06-14
Supplement: Supplementary file 1 [file supplementary]

## Appendix A

**Table 1S:** Covariance matrix (polychromic correlation) of iKetoCheck.

| Question | 1     | 2      | 3     | 4     | 5     | 6     | 7     | 8     | 9     | 10    |
|----------|-------|--------|-------|-------|-------|-------|-------|-------|-------|-------|
| q1       | 1.000 |        |       |       |       |       |       |       |       |       |
| q2       | 0.658 | 1.000  |       |       |       |       |       |       |       |       |
| q3       | 0.364 | 0.235  | 1.000 |       |       |       |       |       |       |       |
| q4       | 0.462 | 0.508  | 0.263 | 1.000 |       |       |       |       |       |       |
| q5       | 0.313 | 0.335  | 0.009 | 0.557 | 1.000 |       |       |       |       |       |
| q6       | 0.190 | -0.012 | 0.256 | 0.098 | 0.129 | 1.000 |       |       |       |       |
| q7       | 0.608 | 0.479  | 0.182 | 0.249 | 0.514 | 0.096 | 1.000 |       |       |       |
| q8       | 0.196 | 0.232  | 0.664 | 0.358 | 0.219 | 0.359 | 0.128 | 1.000 |       |       |
| q9       | 0.316 | 0.238  | 0.282 | 0.296 | 0.461 | 0.111 | 0.515 | 0.362 | 1.000 |       |
| q10      | 0.180 | 0.172  | 0.321 | 0.073 | 0.227 | 0.227 | 0.255 | 0.473 | 0.216 | 1.000 |

## Appendix B

**Table 2S:** iKetoCheck: Assessment tool of adherence to the ketogenic diet therapies

| <b>iKetoCheck - KETOGENIC THERAPIES ADHERENCE'S TOOL</b><br>Below you will find 10 sentences. We ask you to indicate one of the options from 1 to 5, according to how often the above statements occur. These statements concern your experience regarding the management of Ketogenic Diet Therapy followed by your family member or by yourself. |                                                                                                    |
|----------------------------------------------------------------------------------------------------------------------------------------------------------------------------------------------------------------------------------------------------------------------------------------------------------------------------------------------------|----------------------------------------------------------------------------------------------------|
| 1. I shared with family members/acquaintances/school/work the characteristics of the diet and the need not to administer/take foods other than prescribed                                                                                                                                                                                          | 1. I never do<br>2. I do it little<br>3. I do sometimes<br>4. I do this often<br>5. I always do it |
| 2. I organized myself to prepare meals that allow you to follow the diet even outside the home                                                                                                                                                                                                                                                     | 1. I never do<br>2. I do it little<br>3. I do sometimes<br>4. I do this often<br>5. I always do it |
| 3. I measure the levels of ketosis according to the indications of my reference center                                                                                                                                                                                                                                                             | 1. I never do<br>2. I do it little<br>3. I do sometimes<br>4. I do this often<br>5. I always do it |
| 4. Weigh all foods according to the prescribed diet                                                                                                                                                                                                                                                                                                | 1. I never do<br>2. I do it little<br>3. I do sometimes<br>4. I do this often<br>5. I always do it |
| 5. I only eat foods allowed in the dietary prescription                                                                                                                                                                                                                                                                                            | 1. I never do<br>2. I do it little<br>3. I do sometimes<br>4. I do this often<br>5. I always do it |
| 6. All medicines and supplements used are replaced, where possible, with similar sugar-free products                                                                                                                                                                                                                                               | 1. I never do<br>2. I do it little<br>3. I do sometimes<br>4. I do this often<br>5. I always do it |
| 7. I show up for all scheduled appointments with the nutrition team and neurologist/neuropsychiatrist                                                                                                                                                                                                                                              | 1. I never do<br>2. I do it little<br>3. I do sometimes<br>4. I do this often<br>5. I always do it |
| 8. I fill out the monitoring form (for example Ketonemia diary) according to the instructions of the caregiver (doctor/dietitian/nutritionist)                                                                                                                                                                                                     | 1. I never do<br>2. I do it little<br>3. I do sometimes<br>4. I do this often<br>5. I always do it |
| 9. I read the nutritional labels (carbohydrates, proteins and fats) on all packaged products and ask, when in doubt, to the nutritionist / dietitian if their use is permitted before consuming it                                                                                                                                                 | 1. I never do<br>2. I do it little<br>3. I do sometimes<br>4. I do this often<br>5. I always do it |
| 10. I cook at home and talk to the specialist to validate the new recipes that I find                                                                                                                                                                                                                                                              | 1. I never do<br>2. I do it little<br>3. I do sometimes<br>4. I do this often<br>5. I always do it |
